# Supplementary material for: Non-Invasive Delivery of Nano-Emulsified Sesame Oil-Extract of Turmeric Attenuates Lung Inflammation
Source: MDPI journal article supplement (doi:10.3390/pharmaceutics12121206), 2020-12-11
Supplement: s1 [file s1]

## Supplementary Data

# Non-invasive delivery of nano-emulsified sesame oil-extract of turmeric attenuates lung inflammation

Sahibzada Tasleem Rasool <sup>1\*</sup>, Rajasekhar Reddy Alavala <sup>2</sup>, Umasankar Kulandaivelu <sup>2</sup>, Nagaraja Sreeharsha<sup>3, 4\*</sup>

<sup>1</sup> Department of Biomedical Sciences, College of Clinical Pharmacy, King Faisal University, P.O. Box 400,0 Al-Ahsa, 31982, Kingdom of Saudi Arabia; srasool@kfu.edu.sa (S.T.R)

<sup>2</sup> Medicinal Chemistry Research Division, K L College of Pharmacy, K L E F Deemed to be University, Guntur, Andhra Pradesh, India-522 502; sekhar7.pharm@kluniversity.in (R.R.A); umasankar@kluniversity.in (U.K)

<sup>3</sup> Department of Pharmaceutical Sciences, College of Clinical Pharmacy, King Faisal University, Al-Ahsa-31982, Saudi Arabia; sharsha@kfu.edu.sa (N.S.)

<sup>4</sup> Department of Pharmaceutics, Vidya Siri College of Pharmacy, Off Sarjapura Road, Bangalore - 560035, Karnataka, India.

\* Correspondence: srasool@kfu.edu.sa; shasha@kfu.edu.sa

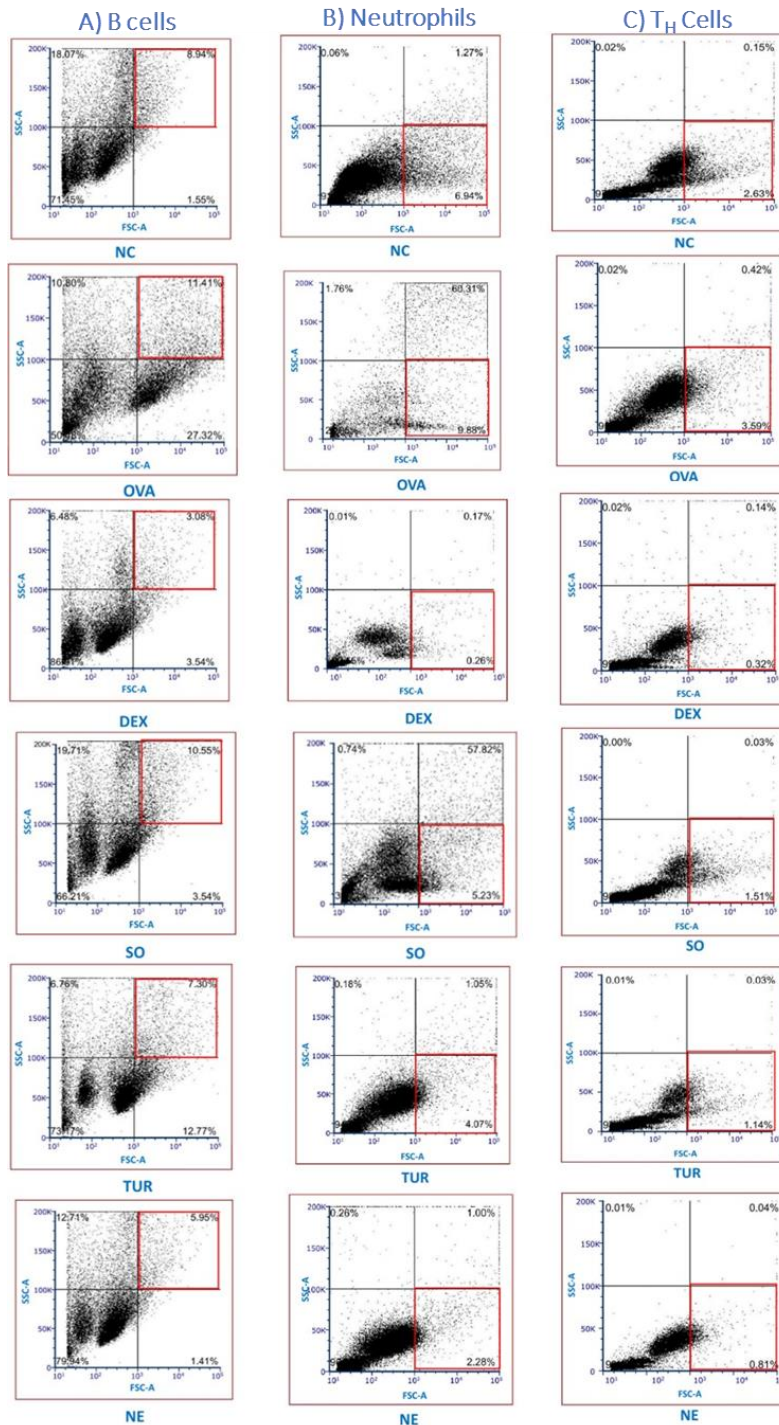

**Figure S1:** The flowcytometry diagram of immune cells infiltration in lung tissue. A) B cells (CD45+B220+), B) neutrophils (CD45+Gr1+), and C) helper T (T<sub>H</sub>) cells (D3+CD4+) in different treatment groups namely NC (Normal control), Ovalbumin sensitized (OVA), Dexamethasone (DEX), vehicle SO, TUR, and nano-emulsion (NE)

*Flow cytometric analysis of BALF: Nano emulsion decreased the infiltration of immune cells in the lung:*

In the case of B cells, the control group population of cells is 8.94 %, which was increased by the OVA treatment to 11.41 % (Figure S1A, S2A). The treatment with TUR and NE has resulted in significant reduction of cell infiltration to 7.3 and 5.95 % respectively. Whereas the DEX has given 3.08 % of B cell infiltration and SO treatment had no significant effect on reduction in cell count (10.55 %).

The number neutrophils found in the control group was 6.94 %, which was increased to 9.88 % by the treatment of OVA (Figure S1B and S2B). The cell count decreased to 4.07 and 2.28 % with the treatment of TUR and NE, respectively. The standard DEX inhibition was found to be 0.26 % and the SO group resulted 5.23 % neutrophils infiltration in the lungs.

Of the overall number of T<sub>H</sub> cells (2.6 %) in the control group, the OVA treatment has risen to 3.59 % and decreased to 1.14 % by TUR (Figure S1C and S2C). Whereas the nano-emulsion has decreased the T<sub>H</sub> cells to 0.81 %, which is comparable with standard DEX of 0.32 %. The SO treatment resulted 1.51 % of infiltration of T<sub>H</sub> cells in the lung tissue.

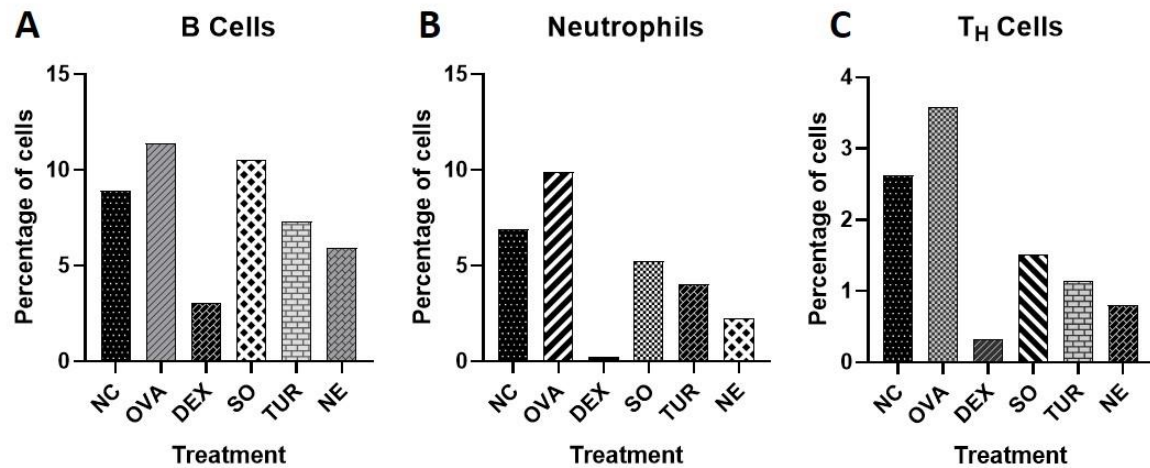

**Figure S2:** Nano-emulsion reduced the population of various immune cells in the lungs of the OVA sensitized mice. (A) B cells (%); (B) Neutrophils (%) and (C) T<sub>H</sub> cells (%) in different treatment groups namely, NC (Normal control), Ovalbumin sensitized (OVA), Dexamethasone (DEX), vehicle SO, TUR, and nano-emulsion (NE).
